# Supplementary material for: Ibrutinib modifies the function of monocyte/macrophage population in chronic lymphocytic leukemia
Source: PubMed Central journal article supplement (PMC5323207; doi:10.18632/oncotarget.11782), 2016-09-01
Supplement: oncotarget-07-65968-s001.pdf [file oncotarget-07-65968-s001.pdf]

## Ibrutinib modifies the function of monocyte/macrophage population in chronic lymphocytic leukemia

### SUPPLEMENTARY FIGURE AND TABLES

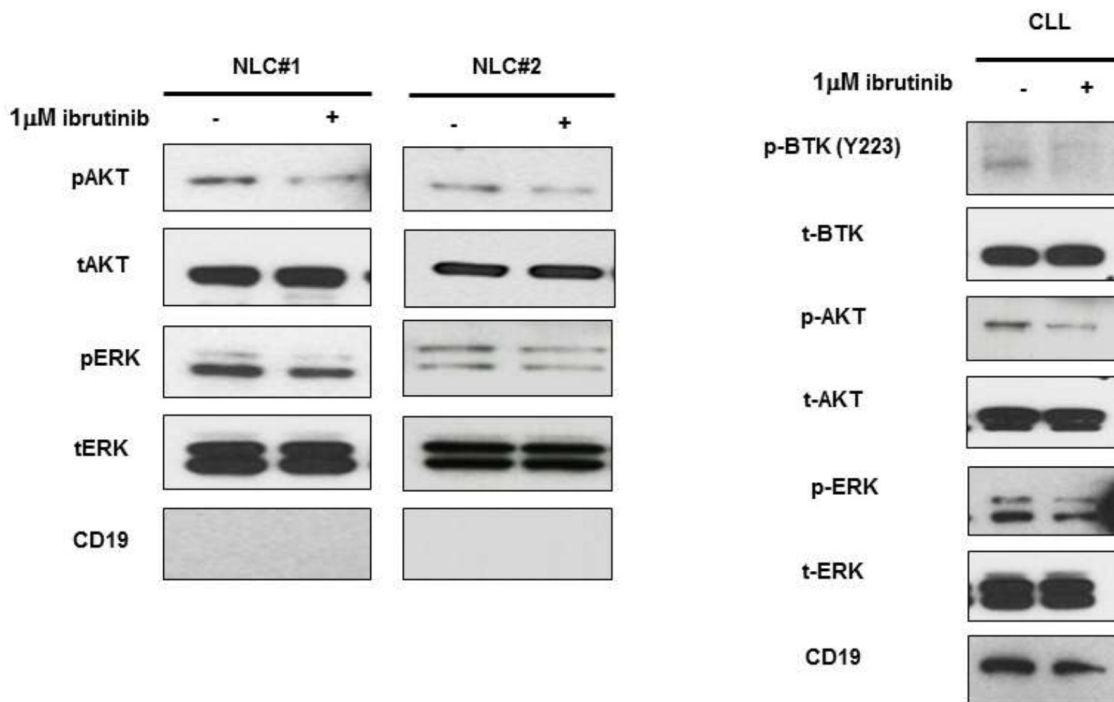

**Supplementary Figure S1: Ibrutinib impairs the activation of BTK-downstream signaling pathways.** Western Blot analysis of AKT and ERK phosphorylation and total levels was performed after 1 hour of treatment with ibrutinib 1 μM. CD19 was used as a marker for CLL cells. On the right, western blot shows a representative CLL sample blotted for BTK, AKT, ERK and CD19.

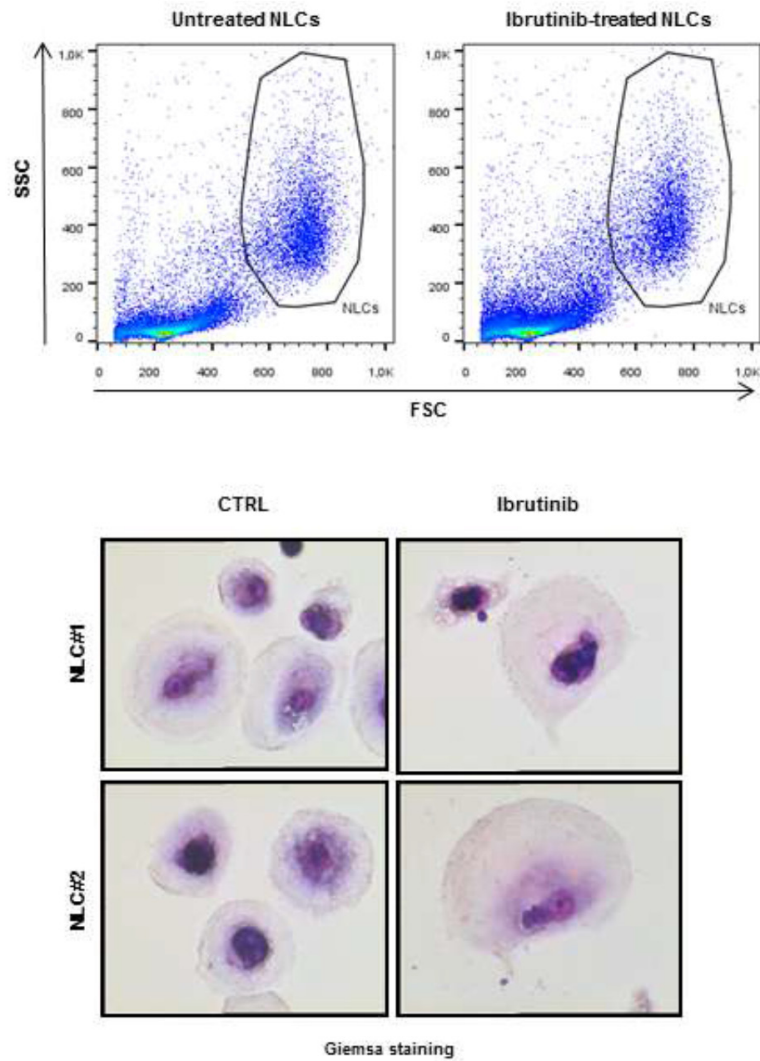

**Supplementary Figure S2: Ibrutinib does not affect NLCs formation.** Dot plots show the preserved morphology of NLCs after treatment with ibrutinib for 24 hours analyzed by flow-cytometric FCS and SSC plots. On the right, May-Grunwald Giemsa staining documented the morphology of NLCs in two representative samples.

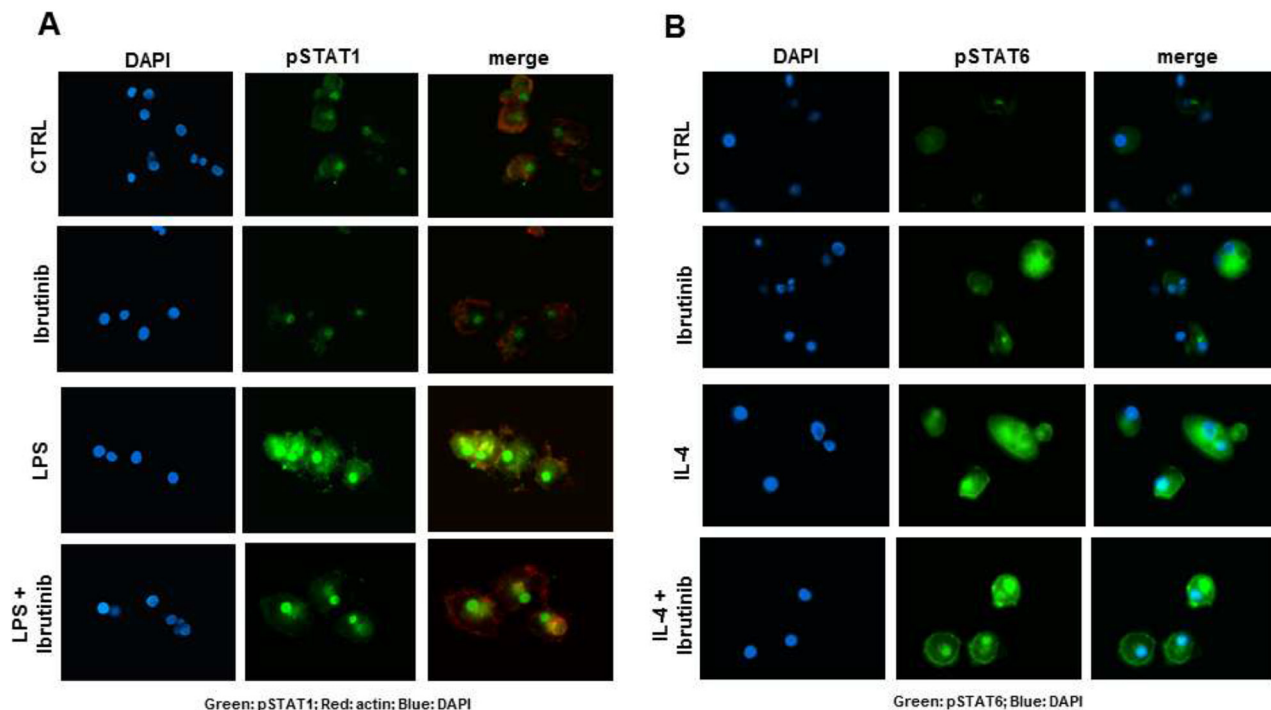

**Supplementary Figure S3: Ibrutinib stimulates M2 signaling pathways affecting M1 polarization in NLCs.** **A.** Immunofluorescence images show pSTAT1 expression after stimulation with LPS for 3 hours either after exposure or not with ibrutinib. NLCs were stained for pSTAT1, DAPI and phalloidin. **B.** Images show pSTAT6 expression after stimulation with IL-4 for 30 minutes either after exposure or not with ibrutinib. NLCs were stained for pSTAT6 and DAPI.

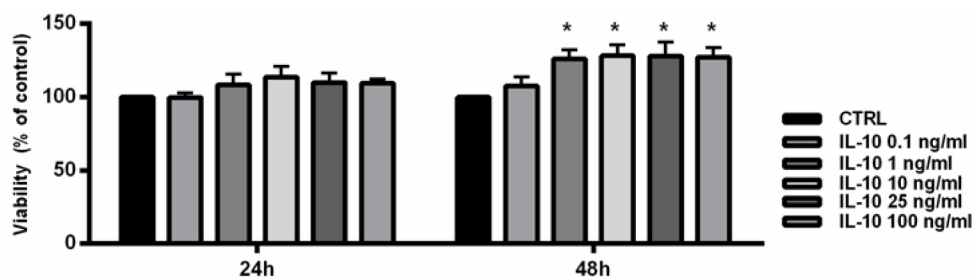

**Supplementary Figure S4: IL-10 mediates pro-survival signals in CD19+ CLL cells.** CD19+ CLL cells (n=4) were cultured for 2 days with a dose escalation of IL-10. Bar diagrams show CLL viability measured by Annexin V-PI staining (\*P<0.05).

**Supplementary Table S1: Primers used in real-time PCR**

| Gene  | Forward primer                  | Reverse primer               |
|-------|---------------------------------|------------------------------|
| CD163 | 5'-GAAGATGCTGGCGTGACAT-3'       | 5'-GCTGCCTCCACCTCTAAGTC-3'   |
| IL10  | 5'-CATAAATTAGAGGTCTCCAAAATCG-3' | 5'-AAGGGGCTGGGTGAGCTAT-3'    |
| MRC1  | 5'-CACCATCGAGGAATTGGACT-3'      | 5'-ACAATTCGTCATTTGGCTCA-3'   |
| CCL18 | 5'-ATGGCCCTCTGCTCCTGT-3'        | 5'-AATCTGCCAGGAGGTATAGACG-3' |
| IL1   | 5'-GGTTGAGTTTAAGCCAATCCA-3'     | 5'-TGCTGACCTAGGCTTGATGA-3'   |
| TNFA  | 5'-CAGCCTCTTCTCCTCCTGAT-3'      | 5'-GCCAGAGGGCTGATTAGAGA-3'   |

Commercially available primers (TaqMan Gene Expression Assays; Life Technologies) used were: Hs00237184\_m1 (NAMPT) and Hs01125301\_m1 (PD-L1).

Supplementary Table S2: Antibodies used in immunoblotting

| Antibody                                   | Manufacturer                     |
|--------------------------------------------|----------------------------------|
| Anti-phospho-BTK Tyr <sup>551</sup> rabbit | GeneTex, Irvine, CA              |
| Anti-phospho-BTK Tyr <sup>223</sup> rabbit | Cell Signaling Tech, Beverly, MA |
| Anti-phospho-STAT1 mouse                   | ECM Biosciences, Versailles, KY  |
| Anti-STAT1 mouse                           | Cell Signaling Tech, Beverly, MA |
| Anti-phospho-Erk 1/2 rabbit                | Cell Signaling Tech, Beverly, MA |
| Anti-Erk 1/2 rabbit                        | Cell Signaling Tech, Beverly, MA |
| Anti-phospho-Akt rabbit                    | Cell Signaling Tech, Beverly, MA |
| Anti-Akt mouse                             | Cell Signaling Tech, Beverly, MA |
| Anti-phospho-I $\kappa$ B $\alpha$ mouse   | Cell Signaling Tech, Beverly, MA |
| Anti-I $\kappa$ B $\alpha$ mouse           | Cell Signaling Tech, Beverly, MA |
| Anti-phospho-STAT6 rabbit                  | Cell Signaling Tech, Beverly, MA |
| Anti-STAT6 rabbit                          | Cell Signaling Tech, Beverly, MA |
| Anti-SHIP1 rabbit                          | Cell Signaling Tech, Beverly, MA |
| Anti-phospho-STAT3 rabbit                  | Cell Signaling Tech, Beverly, MA |
| Anti-STAT3 mouse                           | Cell Signaling Tech, Beverly, MA |
| Anti- $\beta$ actin mouse                  | Abcam, Cambridge, UK             |
